# Supplementary material for: Relative effects of location relative to the corpus luteum and lactation on the transcriptome of the bovine oviduct epithelium
Source: BMC Genomics. 2019 Mar 21;20:233. doi: 10.1186/s12864-019-5616-2 (PMC6427878; doi:10.1186/s12864-019-5616-2)
Supplement: Supplementary file 1 — Table S1. Exhaustive and top-20 lists of up- and down-regulated genes in post-partum lactating (L) vs. non-lactating (NL) cows, heifers (H) vs. L, and H vs. NL comparisons in the ampulla and isthmus ipsilateral to the corpus luteum on Day 3 of the estrous cycle. Lists of associated Gene Ontology (GO) terms are provided for the H vs. NL and H vs. NL comparisons in the isthmus. (XLSX 106 kb) [file 12864_2019_5616_MOESM1_ESM.xlsx]

## Sheet: H vs. L in ipsi ampulla
	baseMean	log2FoldChange	lfcSE	stat	pvalue	padj
GLB1	764.191389361137	-0.976109896935211	0.169207575740918	-5.76871273440961	7.98793323807858e-09	0.000117510485865374		up in heifers
ABCG1	2799.15238382475	-0.732048065599356	0.175883503332614	-4.16211896925306	3.15307993483311e-05	0.0386605779054185
ITGB3	207.127915242192	-0.72915053456742	0.151642863746963	-4.80834057436495	1.52188328043187e-06	0.0055971062346083
CYP51A1	248.069783832215	-0.712481333823049	0.152945380371368	-4.65840375232691	3.18670736108125e-06	0.00937593039777327
CHDH	113.98793241209	-0.703192974278795	0.162926631192256	-4.31601002937951	1.58874763758986e-05	0.0259689627739827
SLC37A1	198.296733910239	-0.695978134856545	0.167242512820664	-4.16149053920788	3.16177099050534e-05	0.0386605779054185
TBC1D8	167.954703814099	-0.655545915011584	0.161625471078783	-4.05595671669871	4.99295057402273e-05	0.0442462271683696
SPATS2L	836.798191734089	0.4954606909721	0.122880265319794	4.03206071929184	5.52898967126173e-05	0.0442462271683696		up in lactating
IFT22	282.066354129837	0.499774974125449	0.124189446691079	4.0242950382784	5.71462386104971e-05	0.0442462271683696
ARHGAP29	865.184211590196	0.617791593946534	0.152025377284653	4.06373991619688	4.82926350084319e-05	0.0442462271683696
RUNX2	91.7422606312425	0.770103454805581	0.190949377793275	4.03302416433799	5.50636150100419e-05	0.0442462271683696
LOC101905549	6.61853129734914	0.816274352428365	0.196988277984234	4.14377119685109	3.41640617748923e-05	0.0386605779054185
FYB	132.065685827408	0.822744076343946	0.183997697996076	4.47149113985922	7.76760786126932e-06	0.0142836599058916
PIGR	108.988203837494	0.846935769000278	0.209934075757885	4.03429393700259	5.47667268676688e-05	0.0442462271683696
C1QB	59.4668412343914	0.883550754289472	0.211470314666009	4.17813136413462	2.9391389189311e-05	0.0386605779054185
PDE5A	42.6559082038318	0.951379105858012	0.211475772810864	4.49876169365695	6.83504227324367e-06	0.0142836599058916
KIF11	36.280238101686	0.95939157689262	0.212974003638446	4.50473560388771	6.64556310324932e-06	0.0142836599058916
MKI67	56.4464781806622	1.03633734649132	0.213103745387241	4.86306491051174	1.1558192243382e-06	0.0055971062346083
CENPF	86.4272229017876	1.04600355922457	0.196800152439378	5.31505461890727	1.06625339509723e-07	0.000784282684763767

## Sheet: H vs. L in ipsi isthmus
	baseMean	log2FoldChange	lfcSE	stat	pvalue	padj
LOC101908066	31.5791750001737	-1.09430821166419	0.229665888444431	-4.76478339502718	1.89056630670093e-06	0.0021708857290854		up in heifers
TMIE	59.170730492593	-1.07488862702339	0.232324904927746	-4.62666121549771	3.71607628914168e-06	0.00335269711486776
AGT	2765.79073279858	-1.02694579458554	0.160450626916965	-6.4003850550051	1.54985591290341e-10	1.08725430689192e-06
ME3	18.9406362336552	-1.02286752781246	0.242219876792248	-4.22288848197944	2.41191175375565e-05	0.00907401696993284
TUBB3	100.433802071606	-0.99292410728863	0.235287560062756	-4.22004506750717	2.44253485058758e-05	0.00907401696993284
GAT	277.581707534357	-0.954644805508627	0.218457135389075	-4.36994105872712	1.24280077565214e-05	0.00603762176817774
PDZK1	1424.71930190728	-0.935389020160318	0.202158243882708	-4.6270139777383	3.70975486039567e-06	0.00335269711486776
GJB4	167.617138833685	-0.926788312414677	0.225186261548727	-4.11565210968313	3.86086276656645e-05	0.0115274340200612
MCTP1	118.930476509667	-0.926534191034289	0.244677691517021	-3.78675385275096	0.000152628159926633	0.0257242035651793
PLA2G4D	203.263854121745	-0.910926706112112	0.221821153953743	-4.10658176587644	4.01557356410967e-05	0.0115274340200612
ABCC8	81.7041850861923	-0.909705260910866	0.227911100721553	-3.99149167386227	6.56589940326875e-05	0.0153581250671644
TIMP1	351.020840558709	-0.873962121217307	0.195240141272821	-4.47634444187411	7.59319470087514e-06	0.00435952919394336
EFCAB3	35.7926861323903	-0.87277341310801	0.243527728255624	-3.58387695462705	0.000338531610134655	0.0403395544114229
SLC18A2	186.120839757381	-0.863666832130547	0.234667732150185	-3.68038172192251	0.000232885064565184	0.0323249587969543
NEBL	1233.84564896078	-0.85211133577417	0.159656760330465	-5.33714534862432	9.442134726475e-08	0.000198772672883509
RNASE11	54.144762980898	-0.842758481182043	0.227193972346622	-3.70942271257212	0.000207732356068234	0.0308055080288704
LOC613970	139.067607181334	-0.841786995277529	0.239552115386326	-3.51400359758868	0.000441406834638283	0.0474859842441228
LOC785803	34.5922207011866	-0.839021038776382	0.237124380827549	-3.53831620286472	0.000402687517023149	0.0452034352522552
ACY1	405.135263595918	-0.819875448326686	0.213165921523002	-3.84618442980445	0.000119971472802137	0.0227310122494285
LDLR	549.634563487827	-0.817309072829191	0.150037706825177	-5.44735780173923	5.11235568761791e-08	0.000152586016426962
BSG	6995.88038299568	-0.783003824082248	0.168489395546809	-4.64719943674269	3.36471828053992e-06	0.00335269711486776
CABYR	66.0031161023378	-0.77674522756334	0.199036003798454	-3.90253628860977	9.51899613184134e-05	0.0200390733568813
CNNM4	74.4190832469879	-0.765276705278196	0.167782930260052	-4.56111181329393	5.08834748008563e-06	0.00346706564492284
CAMK2B	2316.92389479063	-0.764672950996678	0.209130804090772	-3.65643384924191	0.000255748369745919	0.0344425540132914
ITGB3	1098.10720838114	-0.73952915265372	0.200236253674849	-3.69328300485782	0.000221377419794414	0.0317752066979915
GLUD1	1998.21407124929	-0.738031516921286	0.153569697521709	-4.80584079301813	1.54102495375755e-06	0.00216274291010128
LRP2	15952.851730318	-0.730381300719506	0.191937257061251	-3.80531279805894	0.000141625096116236	0.024744492636387
CDKN1C	134.59671318324	-0.721636476077885	0.206554260405988	-3.49368962256933	0.000476394526950298	0.0477566608722954
LOC511937	132.095682447276	-0.716392763560174	0.186037578326801	-3.8507960058571	0.00011773453615558	0.0227310122494285
CABIN1	136.357010607413	-0.707278798288	0.155243359714444	-4.55593591628638	5.21528360807015e-06	0.00346706564492284
GM2A	3538.02396667134	-0.681469229080139	0.17060337677466	-3.99446506841568	6.48404797704238e-05	0.0153581250671644
DHCR24	332.621481797446	-0.680876497712586	0.149911350032464	-4.54186089022038	5.57598319148946e-06	0.00352151218458517
SEC23B	729.796991405405	-0.680461519422872	0.174009763274367	-3.91047896749314	9.21132813079763e-05	0.0197200484101873
SCP2	4946.0647056806	-0.669530983093159	0.191804995675129	-3.49068584338222	0.000481782405831433	0.047916484787849
MCF2L	121.475167522338	-0.669249996787241	0.188471245445724	-3.55093953565438	0.000383858592029866	0.0440774352357204
FBXO44	100.168216595764	-0.662588268953934	0.184101581694496	-3.59903626495428	0.000319398651141121	0.0391010435980843
LOC104974515	523.705549408617	-0.657693679564409	0.174775571859756	-3.76307554062624	0.000167836477324975	0.027531721364828
SQLE	532.693298877147	-0.650734018703678	0.174866846477358	-3.72131156827339	0.000198190726325504	0.030528622734359
WBSCR22	115.030118635973	-0.647973503958491	0.177930628240488	-3.64171986782793	0.000270822683512721	0.0356329303692623
SLC23A1	445.865667252126	-0.646035818493334	0.161150918399648	-4.00888697941633	6.10056034668997e-05	0.0153581250671644
PPIA	318.757532966416	-0.644045393807301	0.153475171097257	-4.19641424213934	2.71174073457644e-05	0.00951444367178751
ANAPC4	1194.82953747436	-0.640167214021646	0.148218468007156	-4.31907860490594	1.5668197326383e-05	0.00706803572962655
TGFA	241.611990988241	-0.632792480512298	0.177879843479156	-3.5574153211263	0.00037452177351795	0.0434301589053119
INSIG1	137.025783024275	-0.631085305679086	0.179671810332355	-3.51243361165957	0.000444022920530028	0.0474859842441228
ADK	162.043284356776	-0.62544462128489	0.173067037293264	-3.61388645155499	0.000301641205271938	0.0381003006378985
HMGCS1	1190.77501985871	-0.624889069725372	0.158736655447451	-3.93664001527509	8.26304171807332e-05	0.0183106105159621
HSPA5	1127.12501776168	-0.611001770385598	0.153530033908297	-3.97968889103839	6.90055130583325e-05	0.0158474297352691
MANF	130.176233257747	-0.610034305696242	0.159506508389496	-3.82451043443701	0.00013103219690155	0.0239864881023692
PROSC	72.2097480916882	-0.606834869423228	0.163798654052742	-3.70476102464084	0.00021159012107783	0.0308055080288704
OGDH	957.847982327162	-0.606306072852931	0.147485630983571	-4.11095012313754	3.94034319662363e-05	0.0115274340200612
NUCB2	287.535513602843	-0.605709619426207	0.114569101366391	-5.28684970207766	1.24440800885437e-07	0.000224544536569137
FASN	1076.0386978442	-0.599973902535889	0.134606166902099	-4.45725419825867	8.30161409871365e-06	0.00440898259327854
COL7A1	247.949376970211	-0.596617249297379	0.164079794253452	-3.63614089115563	0.000276753002575846	0.0360378059333558
IDI1	251.914682615339	-0.595975453246629	0.161532655458659	-3.68950446307222	0.000224691286684508	0.0318884903608093
LOC104969340	340.653959149701	-0.593767588224915	0.14186332166417	-4.18549052185969	2.84550942667224e-05	0.00971395393737759
TXNRD1	183.493279321062	-0.58253860977288	0.130751716570865	-4.4553037241171	8.37745089372852e-06	0.00440898259327854
HSD17B10	515.42900434857	-0.577996802336046	0.141397080682625	-4.08775626445497	4.35565416638924e-05	0.0122258372834806
TST	1341.71525753724	-0.575497371929311	0.153551895679392	-3.74790144649806	0.000178320289442869	0.02887645610196
GNPNAT1	137.533915868426	-0.541160766178601	0.146099664264273	-3.70405208597688	0.000212182661587501	0.0308055080288704
DNAJB9	286.206387126447	-0.531204696330491	0.126294328361719	-4.20608512845542	2.59832393789252e-05	0.00937697990272012
LLGL2	610.319299093788	-0.530301640000156	0.140839892745039	-3.76528006138259	0.000166362507273874	0.027531721364828
SEL1L3	1649.18061763806	-0.510300813519592	0.145858011638186	-3.4986135337251	0.000467683928470865	0.0474859842441228
CYP51A1	762.89983794605	-0.507016808518786	0.141722505287744	-3.57753207572343	0.000346853666292161	0.0409449407377223
HMGCR	1167.39451566029	-0.493138627205525	0.12909363365073	-3.82000733312489	0.000133447706497927	0.0240796854396474
HK1	363.170839200133	-0.475470304712947	0.110723477678351	-4.29421397053819	1.75313336402855e-05	0.00738127584034822
C2CD2L	134.974523957324	-0.472999018020839	0.133988633570872	-3.53014285924971	0.00041533533617997	0.0460184265902562
GDE1	168.912244822139	-0.452460492339146	0.128771001071554	-3.51368311633866	0.000441939684755493	0.0474859842441228
DSG2	1511.98132234509	-0.448356054330852	0.11840708220999	-3.78656450241475	0.000152744459455977	0.0257242035651793
COPS3	338.54903631918	-0.378441363095631	0.102161077023736	-3.70435956746723	0.00021192547329699	0.0308055080288704
DDX5	6956.27589322728	-0.311637402891094	0.0810430442387978	-3.84533189514497	0.000120389376194242	0.0227310122494285
FGF2	529.305164169475	0.3649342690382	0.104170832558156	3.50322887968151	0.000459654317354731	0.0474859842441228		up in lactating
CHPT1	128.124686646375	0.557173753859569	0.153663553712114	3.62593302315152	0.000287919979458248	0.0367345177832034
PRKAG3	135.438705427346	0.568244084170366	0.149114018271643	3.81080257078975	0.000138516360547227	0.0246422556348172
NFKBIZ	263.913816651008	0.58022166481291	0.165870362720336	3.49804302165292	0.000468685522500292	0.0474859842441228
RPL37	4416.25979142693	0.59771979139796	0.16349638079019	3.65585946617985	0.000256321754195978	0.0344425540132914
CGNL1	156.019379181916	0.608086461832256	0.159900505744887	3.802905181566	0.000143009101611611	0.024744492636387
KNSTRN	141.110023450154	0.618828075028279	0.149117453107134	4.14993726176157	3.32566414915918e-05	0.0110543325968499
LOC104968720	56.740970829453	0.634477878548383	0.181242185973096	3.50071852831529	0.000464005639333518	0.0474859842441228
LOC784738	2492.73806662106	0.65310647010122	0.179806462682494	3.63227472671262	0.000280933796846817	0.0362089264078791
ALDH9A1	542.230738952318	0.663707946164389	0.171479803111701	3.87047298935872	0.000108624392604343	0.0217783286188169
TXNIP	3153.46306037655	0.664989324527129	0.164483394357381	4.04289640984837	5.27949495087199e-05	0.0138927709842633
C28H10orf54	122.586219490996	0.669365215917708	0.158608348310183	4.22023949589754	2.44042916240083e-05	0.00907401696993284
NTN4	138.466812649163	0.684988510991836	0.158182444150785	4.33037000198886	1.48859005222643e-05	0.00696384479617484
BRCA2	67.2121767078078	0.718875396718384	0.196463947867722	3.6590703002792	0.000253131899696151	0.0344425540132914
TACR1	181.213284517846	0.754611566754185	0.191107700639823	3.94861936085132	7.860322088235e-05	0.0177292371958029
LOC783920	59.976493298466	0.763926833273737	0.21562502249475	3.54284871224691	0.000395829711712669	0.0450425683661507
MMRN2	94.5834417854088	0.765521000307446	0.212369669349921	3.60466258035228	0.000312558739207612	0.0387051905385426
STEAP4	365.140530211629	0.781699094161147	0.219749263485567	3.55723191860658	0.000374783257119705	0.0434301589053119
HIST1H1D	184.59095464116	0.797423747700723	0.213414634798032	3.7364998349592	0.000186599571466607	0.0298346732556293
LOC101908813	110.217819599971	0.799880103492211	0.228569303779868	3.49950798407543	0.000466117645432681	0.0474859842441228
CHRDL1	59.3758301009037	0.810221676886898	0.225251218143972	3.59696912435356	0.000321946681513797	0.0391010435980843
ERBB4	101.698066865305	0.811381479366791	0.14807893331238	5.47938495515187	4.26806854184622e-08	0.000152586016426962
MAP3K15	175.475782446414	0.815274820510668	0.212367972332576	3.83897256990295	0.000123550231017533	0.0229494554115067
LOC101902444	48.5891838193794	0.821199262846883	0.198878144376781	4.12915790933313	3.64094287860118e-05	0.0115236341726476
DRAM1	35.1806276266114	0.838418292673623	0.23973076192707	3.49733294940548	0.000469934924433169	0.0474859842441228
LOC101904283	56.9382911450812	0.854150959991853	0.207169986105266	4.1229474213405	3.74055103379425e-05	0.0115236341726476
PSMB9	117.750991203357	0.856161744292412	0.244448486170707	3.50242195279755	0.000461048835676604	0.0474859842441228
AIF1L	33.1423643203397	0.858163652269336	0.242611347905939	3.53719502272437	0.000404400932903558	0.0452034352522552
CSF1R	68.8182297887201	0.860903932283675	0.244200564309038	3.52539698145084	0.000422848606035788	0.0464434847203308
GPR126	52.3776507508375	0.864946467870201	0.239666421633257	3.60895974486472	0.000307427305094978	0.0384466761450957
LOC101905641	25.8010318575338	0.866697197713545	0.233215401121207	3.71629486537686	0.000202165634398092	0.0307657123865338
LOC505183	42.7138753488781	0.873387179155492	0.236959146055859	3.68581332982018	0.000227973409902421	0.0319948015608608
HIST2H2BF	51.332281458793	0.874492884305947	0.243702882866382	3.588356748268	0.00033276875064515	0.0400304960895132
H2B	96.7223083856418	0.878807341910952	0.240799402256229	3.64954121013902	0.000262709093533646	0.0349292480044577
FLT3	33.4253973958818	0.900239544942533	0.229807599381042	3.9173619469818	8.95232832092372e-05	0.0194960101761358
LOC100847863	72.9245890841895	0.902349100024295	0.24222691073664	3.72522234329847	0.000195143141910831	0.030528622734359
TNFSF9	50.0377738262771	0.907791488651133	0.234336301328742	3.87388331856286	0.000107114712605451	0.0217783286188169
DYRK4	26.3221135910695	0.912940846103407	0.237438634689123	3.84495491771469	0.000120574603809018	0.0227310122494285
HIST1H2BL	27.7657844307875	0.913133860491447	0.245191341178706	3.72416846411357	0.000195960044366229	0.030528622734359
LOC101906554	17.7007279996074	0.924224571884022	0.230876307937502	4.00311569489498	6.25137118363048e-05	0.0153581250671644
LOC101906512	104.746563060422	0.925780784559433	0.228808823155234	4.04608865948908	5.20805147522931e-05	0.0138927709842633
LOC100297225	31.2044064422675	0.930803450198166	0.230536603795363	4.03755167237737	5.40119502710503e-05	0.0139229580382375
KLF11	104.905660151757	0.931038422750003	0.210157071195458	4.43020269293762	9.41445581657993e-06	0.00475655965676885
PDK4	683.558194409136	0.938116373226742	0.173160597363246	5.41760878347409	6.04013998998347e-08	0.000152586016426962
FYB	55.1619911260221	0.944505664684893	0.243337865215778	3.88145783989418	0.000103832154334743	0.0215000646131498
FAM101B	41.684075661794	0.962569971769837	0.240690969358759	3.9991943791422	6.35584642955535e-05	0.0153581250671644
BOLA-DMA	68.4617770849633	0.988332412337677	0.244444480004917	4.04317746229244	5.27316782340632e-05	0.0138927709842633
PHLDB2	40.6428287011551	0.997740703886989	0.231531016852145	4.30931767783037	1.63758997525855e-05	0.00713255137154853
LOC518961	220.687201158602	1.00002119343828	0.218596313507698	4.57473951592082	4.76812847140487e-06	0.00346706564492284
FGD3	17.0701365191886	1.01218666917182	0.245308412658245	4.12618001235028	3.68838601445269e-05	0.0115236341726476
VNN1	50.0679489967371	1.02769092333765	0.243080596951089	4.22777850732544	2.36009949274364e-05	0.00907401696993284
BLA-DQB	232.535302265933	1.04155708103145	0.226617196250179	4.59610787824593	4.30455895226934e-06	0.00346706564492284
ASB15	51.781142227486	1.06171030115218	0.234678451783996	4.52410646602271	6.06511898924244e-06	0.00364802466443435
ACSBG2	34.8654371020073	1.08200381269906	0.237314563354125	4.55936541527997	5.13084258965572e-06	0.00346706564492284
ABCA13	2182.88315883632	1.09163769102727	0.221770897941178	4.92236673594936	8.55037882604017e-07	0.00134999793689642
COL3A1	35.3594496966512	1.15972686259103	0.242416427992261	4.7840275190758	1.71817145022952e-06	0.00217022235878491
SAA3	3535.31773502926	1.1780776243151	0.184526609771725	6.38432378816518	1.72156489096971e-10	1.08725430689192e-06

## Sheet: top 20 H vs L ipsi isthmus
		baseMean	log2FoldChange	lfcSE	stat	pvalue	padj
up in H	LOC101908066	31.5791750001737	-1.09430821166419	0.229665888444431	-4.76478339502718	1.89056630670093e-06	0.0021708857290854
	TMIE	59.170730492593	-1.07488862702339	0.232324904927746	-4.62666121549771	3.71607628914168e-06	0.00335269711486776
	AGT	2765.79073279858	-1.02694579458554	0.160450626916965	-6.4003850550051	1.54985591290341e-10	1.08725430689192e-06
	ME3	18.9406362336552	-1.02286752781246	0.242219876792248	-4.22288848197944	2.41191175375565e-05	0.00907401696993284
	TUBB3	100.433802071606	-0.99292410728863	0.235287560062756	-4.22004506750717	2.44253485058758e-05	0.00907401696993284
	GAT	277.581707534357	-0.954644805508627	0.218457135389075	-4.36994105872712	1.24280077565214e-05	0.00603762176817774
	PDZK1	1424.71930190728	-0.935389020160318	0.202158243882708	-4.6270139777383	3.70975486039567e-06	0.00335269711486776
	GJB4	167.617138833685	-0.926788312414677	0.225186261548727	-4.11565210968313	3.86086276656645e-05	0.0115274340200612
	MCTP1	118.930476509667	-0.926534191034289	0.244677691517021	-3.78675385275096	0.000152628159926633	0.0257242035651793
	PLA2G4D	203.263854121745	-0.910926706112112	0.221821153953743	-4.10658176587644	4.01557356410967e-05	0.0115274340200612
	ABCC8	81.7041850861923	-0.909705260910866	0.227911100721553	-3.99149167386227	6.56589940326875e-05	0.0153581250671644
	TIMP1	351.020840558709	-0.873962121217307	0.195240141272821	-4.47634444187411	7.59319470087514e-06	0.00435952919394336
	EFCAB3	35.7926861323903	-0.87277341310801	0.243527728255624	-3.58387695462705	0.000338531610134655	0.0403395544114229
	SLC18A2	186.120839757381	-0.863666832130547	0.234667732150185	-3.68038172192251	0.000232885064565184	0.0323249587969543
	NEBL	1233.84564896078	-0.85211133577417	0.159656760330465	-5.33714534862432	9.442134726475e-08	0.000198772672883509
	RNASE11	54.144762980898	-0.842758481182043	0.227193972346622	-3.70942271257212	0.000207732356068234	0.0308055080288704
	LOC613970	139.067607181334	-0.841786995277529	0.239552115386326	-3.51400359758868	0.000441406834638283	0.0474859842441228
	LOC785803	34.5922207011866	-0.839021038776382	0.237124380827549	-3.53831620286472	0.000402687517023149	0.0452034352522552
	ACY1	405.135263595918	-0.819875448326686	0.213165921523002	-3.84618442980445	0.000119971472802137	0.0227310122494285
	LDLR	549.634563487827	-0.817309072829191	0.150037706825177	-5.44735780173923	5.11235568761791e-08	0.000152586016426962
up in L	DYRK4	26.3221135910695	0.912940846103407	0.237438634689123	3.84495491771469	0.000120574603809018	0.0227310122494285
	HIST1H2BL	27.7657844307875	0.913133860491447	0.245191341178706	3.72416846411357	0.000195960044366229	0.030528622734359
	LOC101906554	17.7007279996074	0.924224571884022	0.230876307937502	4.00311569489498	6.25137118363048e-05	0.0153581250671644
	LOC101906512	104.746563060422	0.925780784559433	0.228808823155234	4.04608865948908	5.20805147522931e-05	0.0138927709842633
	LOC100297225	31.2044064422675	0.930803450198166	0.230536603795363	4.03755167237737	5.40119502710503e-05	0.0139229580382375
	KLF11	104.905660151757	0.931038422750003	0.210157071195458	4.43020269293762	9.41445581657993e-06	0.00475655965676885
	PDK4	683.558194409136	0.938116373226742	0.173160597363246	5.41760878347409	6.04013998998347e-08	0.000152586016426962
	FYB	55.1619911260221	0.944505664684893	0.243337865215778	3.88145783989418	0.000103832154334743	0.0215000646131498
	FAM101B	41.684075661794	0.962569971769837	0.240690969358759	3.9991943791422	6.35584642955535e-05	0.0153581250671644
	BOLA-DMA	68.4617770849633	0.988332412337677	0.244444480004917	4.04317746229244	5.27316782340632e-05	0.0138927709842633
	PHLDB2	40.6428287011551	0.997740703886989	0.231531016852145	4.30931767783037	1.63758997525855e-05	0.00713255137154853
	LOC518961	220.687201158602	1.00002119343828	0.218596313507698	4.57473951592082	4.76812847140487e-06	0.00346706564492284
	FGD3	17.0701365191886	1.01218666917182	0.245308412658245	4.12618001235028	3.68838601445269e-05	0.0115236341726476
	VNN1	50.0679489967371	1.02769092333765	0.243080596951089	4.22777850732544	2.36009949274364e-05	0.00907401696993284
	BLA-DQB	232.535302265933	1.04155708103145	0.226617196250179	4.59610787824593	4.30455895226934e-06	0.00346706564492284
	ASB15	51.781142227486	1.06171030115218	0.234678451783996	4.52410646602271	6.06511898924244e-06	0.00364802466443435
	ACSBG2	34.8654371020073	1.08200381269906	0.237314563354125	4.55936541527997	5.13084258965572e-06	0.00346706564492284
	ABCA13	2182.88315883632	1.09163769102727	0.221770897941178	4.92236673594936	8.55037882604017e-07	0.00134999793689642
	COL3A1	35.3594496966512	1.15972686259103	0.242416427992261	4.7840275190758	1.71817145022952e-06	0.00217022235878491
	SAA3	3535.31773502926	1.1780776243151	0.184526609771725	6.38432378816518	1.72156489096971e-10	1.08725430689192e-06

## Sheet: H vs. NL in ipsi isthmus
	baseMean	log2FoldChange	lfcSE	stat	pvalue	padj
GAT	245.321140805404	-1.67995555960132	0.143828397509048	-11.6802772518942	1.6077028298602e-31	2.22843689246922e-27		up in heifers
MUC15	52.7883380643334	-1.07410173284896	0.211031144881858	-5.08977825737654	3.58482464231385e-07	0.000297719586419459
FAT4	159.002045939677	-1.06432725788605	0.23578049203087	-4.5140598728868	6.35982495241512e-06	0.00236105997901887
ANG	191.63053556468	-1.05259122814713	0.219721498870156	-4.79057003324539	1.66308162540795e-06	0.000960498933740819
SUSD2	301.26775792167	-1.04560620432844	0.22497520479942	-4.64765086117229	3.35736540235605e-06	0.00145426380756429
GM2A	3168.66125854393	-1.04488040340999	0.172459863697596	-6.05868740127362	1.37236797755622e-09	6.34079751230225e-06
S100A4	72.5019691882895	-1.01461057641156	0.229584600791967	-4.41933201491562	9.90064445189627e-06	0.00319146122669149
PRPF4	1407.55855247209	-1.00018094081835	0.177190720271375	-5.64465757172009	1.6551033539092e-08	3.51725507288229e-05
FER1L6	38.2815147342833	-0.975232805544389	0.216956478810019	-4.49506191699565	6.95497065335621e-06	0.00247186790323514
LOC785161	14.9806802279079	-0.969499637829917	0.254624729776571	-3.80756275590606	0.000140343131217594	0.0155623691344566
EPHA5	39.1106803446793	-0.967470284630673	0.233136655991319	-4.14979909751599	3.32767210870447e-05	0.0072070098591801
SLC7A5	260.413208302301	-0.952012717104255	0.213025769563191	-4.46900259558436	7.8585177230181e-06	0.00272317285396885
LRP2	15082.0499065016	-0.951074768313552	0.154978017258871	-6.13683659873454	8.4180892105097e-10	5.83415672734375e-06
CNDP1	54.4525755921599	-0.937829383947085	0.200956242809561	-4.66683378846723	3.05876565014257e-06	0.00136766292505246
BSG	6628.07322509954	-0.930362488609456	0.165267982094564	-5.62941760901465	1.80819119901105e-08	3.51725507288229e-05
ENDOU	36.0628121891381	-0.93031147738981	0.231948185060786	-4.01085905089538	6.04982208677306e-05	0.00945476491069145
CHADL	28.6373198992415	-0.913339006698702	0.226929069103047	-4.0247774791865	5.70292149117349e-05	0.00929978762225362
CREB3L1	575.061196521582	-0.91149702659305	0.184195760052391	-4.94852338801823	7.47786061317284e-07	0.00049357440932947
ATP1B2	258.903499894545	-0.910953798654067	0.164739960591739	-5.52964681660698	3.20876154303801e-08	4.70390341252757e-05
GJB3	129.338556186763	-0.9102566245557	0.192639070303222	-4.72519215921733	2.29897857809657e-06	0.00127464568283986
FABP5	85.25696260731	-0.908233357636919	0.231164563838624	-3.92894716454446	8.53185808493339e-05	0.0111566117844586
MMP11	33.8321272400935	-0.907348036911542	0.211974217062095	-4.28046415024967	1.86503930113826e-05	0.00488398654424948
DUSP5	34.3039475119632	-0.903437544496885	0.220333467398564	-4.10031918965195	4.12580683012785e-05	0.00814318174263136
AKAP12	181.383518148537	-0.901953921873154	0.223609159533625	-4.03361795981136	5.49245891867587e-05	0.00929978762225362
TIMP1	335.426020400435	-0.897747053743437	0.217883375948421	-4.12031000454095	3.78362966487395e-05	0.00771248393894379
SCNN1A	579.550907029673	-0.897673868006969	0.17447378186443	-5.14503588111871	2.67469683240572e-07	0.000247159818626504
TFF3	780.879633251394	-0.896655749154749	0.191544735500454	-4.68118190151263	2.85225710656454e-06	0.00136328054324452
DSC3	1138.31169949121	-0.890829381906598	0.212487310074916	-4.19238862590204	2.76032606407456e-05	0.00627227534002253
CGREF1	514.031008995994	-0.889081220422164	0.182212074983613	-4.87937597166447	1.06422022648731e-06	0.000670507116333667
HIF3A	724.766782762386	-0.887245935631434	0.169858051775341	-5.22345526960905	1.7561490168174e-07	0.000187222886905628
LOC104974515	490.051362484575	-0.881379722174711	0.15712482703047	-5.60942365908725	2.03001519248671e-08	3.51725507288229e-05
RNASE1	69.8504764688652	-0.860713924375393	0.20393162400333	-4.22060054972807	2.43652347654785e-05	0.00582287101869478
LAMA2	499.841161766373	-0.853185505820143	0.21560955499289	-3.95708578800359	7.58696891050006e-05	0.0103100956929844
FAM105A	129.384985896124	-0.852810377353268	0.204626461041703	-4.16764465852472	3.07763201301271e-05	0.00688049311812405
LOC104968712	77.8296761488804	-0.851782501595205	0.238310538250676	-3.57425444903835	0.000351227248844635	0.029526284946872
SEMA6C	26.9459984030843	-0.851015388611283	0.232165438799893	-3.6655558769227	0.000246801914898647	0.023922526870001
GNAL	404.880710983202	-0.84824099400209	0.196757015552934	-4.31110927159741	1.62437604017642e-05	0.00441479927311476
UHRF1	116.985215380752	-0.845365510153852	0.241394244560052	-3.50201187147008	0.000461759043655504	0.0353454519979957
LRRC3	109.941866076157	-0.838587130697199	0.188206874173471	-4.45566685265848	8.36328203750246e-06	0.00282740127614199
BPIFA1	17.3290950931826	-0.838103069736741	0.248455540696502	-3.37325167869979	0.000742860181927532	0.0475896483298479
FMNL2	131.957653658759	-0.831147845219954	0.227826471750692	-3.64816186123212	0.000264123228084363	0.0244012686390844
GJB5	589.833498476505	-0.826166273321373	0.212842776699992	-3.88158003823582	0.000103779983961375	0.0127300385636161
AFMID	64.2403235276838	-0.824511475101726	0.238597197660985	-3.45566286270155	0.000548941452181119	0.0392210178798066
SLC31A2	671.818663247033	-0.822691404249767	0.197692037791332	-4.16147971077184	3.16192094479775e-05	0.0069567279707685
SALL1	476.81120809264	-0.819995874671184	0.177043488369165	-4.63160708266975	3.62838251951173e-06	0.00152403060918037
MBOAT2	713.758030183212	-0.819152891997949	0.222418177435952	-3.68294040280872	0.000230559076067801	0.0228269953812557
LOC104974911	45.2763179951009	-0.814774743674141	0.223683260081105	-3.6425378608069	0.000269963255823962	0.0244012686390844
GLUD1	1910.46690906065	-0.812760759842762	0.177253950264639	-4.58528996746934	4.53356810119615e-06	0.00179542249859085
SLC31A1	2137.52710430447	-0.811294596104309	0.155726355376665	-5.20974496668839	1.89100383571084e-07	0.000187222886905628
P2RY2	216.745706628913	-0.809301403360029	0.184589780286117	-4.38432399727437	1.16346503510071e-05	0.00350582366337628
LOC100848461	314.420375696015	-0.806132309431082	0.223937991769472	-3.59980145870442	0.000318460242771354	0.0281157797774123
CSTB	1390.90426742336	-0.805566289420874	0.165946427582298	-4.85437560276111	1.20766649715585e-06	0.000727802839872926
FLVCR1	557.654099382159	-0.789230091864285	0.167604700253904	-4.70887803664624	2.49084049689459e-06	0.00132790538951753
MGAT3	467.508666833982	-0.773399684768417	0.178059230116095	-4.34349673568823	1.40232562292523e-05	0.00389134104497365
ABLIM2	298.33002484752	-0.771373792480372	0.177601614999605	-4.34328140812282	1.40370140861902e-05	0.00389134104497365
RNASE4	339.301941298618	-0.752533110491506	0.212835966230376	-3.5357422141564	0.000406631282672137	0.0329609135036169
PMVK	126.113741260317	-0.747448208401881	0.187185421346924	-3.99308986257313	6.52178378632739e-05	0.00961685585768978
S100A2	119.666678336587	-0.746754566014195	0.18688707615851	-3.99575284371631	6.44889871873962e-05	0.00961163281080106
OSBPL8	1251.05514459501	-0.746119449885217	0.146692370287258	-5.08628668569566	3.65141978870991e-07	0.000297719586419459
LOC100296081	155.599905245624	-0.744680179468715	0.222021035196965	-3.35409741157217	0.000796243264326791	0.049965495753133
BPIFB1	834.062124574105	-0.743701838470297	0.212275767247945	-3.5034702647035	0.00045923792494781	0.0353454519979957
AGT	2847.66163592129	-0.740737064280629	0.201660405596802	-3.67319039197835	0.000239540868014648	0.0235033564718321
SLC13A5	474.309263585933	-0.734302684821027	0.201093924709213	-3.65154087018216	0.000260671604416627	0.0242496249887296
GCA	95.3605128294559	-0.72973468021759	0.201084274829692	-3.62899923843193	0.000284522080056666	0.0254436164623577
C13H10orf113	73.0475330448798	-0.729050629958924	0.214653916812978	-3.3964003116427	0.00068278423126413	0.0448534228888725
KLK10	61.2170355010522	-0.727128756270392	0.21002441560425	-3.46211536491321	0.000535947370600156	0.0388940654653862
ACY1	410.598647788989	-0.727082076621235	0.210259061399904	-3.45802968861521	0.000544141417342425	0.0390795035532817
KSR2	721.468418975582	-0.713663395268614	0.184360069761226	-3.87103018670429	0.000108376368817285	0.0129679036500833
MYCL	68.6523705050305	-0.709544215383981	0.188813326371707	-3.7579138560757	0.000171335841599372	0.0181289015298389
SLC30A4	313.926504301931	-0.708440552198133	0.204027877304677	-3.47227330675118	0.000516070656998491	0.0378479120457994
KIAA1644	978.328651502107	-0.707252443418869	0.19068927253287	-3.70892622340335	0.000208140058717738	0.0209060098107723
C8H9orf64	120.887429110022	-0.703934328828476	0.173935362408757	-4.04710301045164	5.18554248471354e-05	0.00916904165233256
MYO1A	251.919582634154	-0.695680593388757	0.173615474580107	-4.00701950716821	6.14897862911718e-05	0.00945476491069145
CYB5B	352.765056914719	-0.676952586234787	0.135622287616234	-4.9914552993704	5.99260524542408e-07	0.00043717632266749
RAPGEF3	136.390394089289	-0.674734806604887	0.157815899790878	-4.27545518226603	1.90747171925311e-05	0.00489619731491989
NEBL	1288.15787910805	-0.670908442571601	0.116037914735115	-5.78180368117711	7.39039234889031e-09	2.04876456695937e-05
MRPS36	925.492799721333	-0.670524964024426	0.176853839402548	-3.79140744860055	0.000149795970357239	0.0162212651962632
PBXIP1	3258.47167570657	-0.667528482850895	0.161049534554656	-4.14486440272421	3.40014851309776e-05	0.00725068592923815
GAL3ST2	226.53793330748	-0.663085166564314	0.173544359847753	-3.82083962363297	0.000132998120079534	0.014866830180826
SEL1L3	1557.42848717479	-0.656679100812116	0.169055607232705	-3.88439704285109	0.000102584151330136	0.012695704657027
LPHN3	1169.35528823793	-0.651079362133724	0.118312681873674	-5.50303950365103	3.73298734130317e-08	4.70390341252757e-05
ODC1	200.319522382775	-0.647647954517466	0.14239331516448	-4.54830308409745	5.40802128453923e-06	0.00208223841736106
LOXL4	90.0163117321992	-0.638840234748252	0.18135109967155	-3.52267086279197	0.000427221560156951	0.0340328623295144
HK2	95.4995398995193	-0.630881498284747	0.179433221072065	-3.51596819426972	0.000438153469782346	0.0345070752537108
TSKU	280.91502869255	-0.629695822340128	0.159526268950556	-3.94728608951104	7.90420852913895e-05	0.0106369159633393
CAMK2B	2425.56470546078	-0.627738692982268	0.175385086246823	-3.57920223672176	0.000344644689156246	0.0293074848858573
MECOM	2015.14311819927	-0.625432404030804	0.153366821161978	-4.07801634859638	4.54215733587996e-05	0.00850795173413947
RABEP1	1549.27027667924	-0.609782859370256	0.149988958239252	-4.06551833233998	4.79258266774411e-05	0.00885733178101348
TXNDC17	93.3338956434079	-0.606088663152342	0.169143474932245	-3.58328137337328	0.000339304767120792	0.029211822217772
TTC39C	192.127133010653	-0.604308584877088	0.157018972194204	-3.84863419007526	0.000118778225579011	0.0137735068782383
OGDH	953.715990319353	-0.603324015908111	0.130571675653846	-4.62063470417245	3.82567856122864e-06	0.00155963913344677
PARP14	816.568568823909	-0.589670559125439	0.148066668994517	-3.98246656813274	6.82037212085278e-05	0.00974610082135468
GSN	783.49981876431	-0.589386602251152	0.16836417937882	-3.50066507273515	0.000464098713197836	0.0353454519979957
SETX	8408.10384231441	-0.564946944102593	0.137422699200112	-4.11101621050194	3.93921540082512e-05	0.00791325574939666
TJP3	450.820161463598	-0.559712991031203	0.112941244549349	-4.95578912083479	7.20373144323774e-07	0.00049357440932947
RNF180	301.489505720995	-0.559389000558009	0.131975187152023	-4.23859221289563	2.24925793574525e-05	0.00566853895406634
PTCH2	1262.48181057589	-0.55904877741989	0.150093798372521	-3.72466273411493	0.000195576517294615	0.0200806378238567
HSD17B10	514.867433560113	-0.554895436020954	0.13717075103466	-4.04528977085462	5.22584438737661e-05	0.00916904165233256
SOX5	732.495627464193	-0.549831108122483	0.157911750777249	-3.48188849415063	0.000497890972730503	0.0373041447190135
PTRF	938.789905784377	-0.548442544219137	0.147505067576565	-3.71812679543675	0.00020070553045305	0.0204557305706597
ALCAM	381.359453190308	-0.544855842775879	0.137067959738487	-3.97507808400602	7.03561688595998e-05	0.00984156255659444
FRYL	6879.22560542065	-0.540541321882327	0.134973656013715	-4.00479128925278	6.20722607945258e-05	0.00945476491069145
UNC13B	417.143937781486	-0.531595405947957	0.15610448167994	-3.40538208914389	0.000660715388890619	0.0437712803161288
POLR2G	147.259096485592	-0.530850363866863	0.151864618740601	-3.4955499725292	0.000473085856609385	0.0358330221773917
SH3BGRL	630.56834692957	-0.527751097832273	0.132849294283378	-3.97255477102149	7.11058795185841e-05	0.00984156255659444
CNOT1	7687.74948894317	-0.508352098832622	0.115324846672891	-4.40800151483852	1.04328815769012e-05	0.00328659480766881
TM9SF3	3882.04478906763	-0.499340187297145	0.114795041926968	-4.34984106382246	1.36236238155357e-05	0.00389134104497365
PNKD	174.713451741201	-0.498722786265592	0.134446703630303	-3.70944599457763	0.00020771325597758	0.0209060098107723
DNAJB9	287.340149747084	-0.494931346640375	0.116992877111251	-4.23043999652844	2.33234653609261e-05	0.00567169391873328
MRPL19	283.044928294336	-0.475536139553188	0.134953529936371	-3.52370286110632	0.000425561193203296	0.0340328623295144
CD320	177.639934930451	-0.470889581739368	0.123073252897649	-3.82609194648468	0.000130193677760421	0.0146716631498958
SLC23A1	468.730803584682	-0.467679361163832	0.134406473299787	-3.47958955905863	0.00050218248980434	0.03742339511386
TRPM4	225.063979160188	-0.464275973762374	0.132137957018055	-3.51357009174084	0.000442127748966206	0.0346233487481389
HIBCH	321.923999782565	-0.460183881153394	0.136121465676611	-3.38068561682012	0.000723052199553659	0.0468328342897816
USP54	1734.40916032508	-0.452770838060893	0.109393014605108	-4.13893738732154	3.48918150785704e-05	0.0073278098303646
MAPKAPK5	766.731804226672	-0.449235387876587	0.114241790573259	-3.9323209626035	8.41296340901843e-05	0.0111566117844586
SORBS2	899.621379399953	-0.446416618355466	0.114364841177802	-3.90344282174471	9.48339621973459e-05	0.0121712365742353
ESRP1	1627.88006098083	-0.434751341570604	0.112318699557909	-3.8706942235069	0.000108525851194695	0.0129679036500833
LOC104968722	433.296509592457	-0.43155936951416	0.092060905020146	-4.68775936343142	2.76212527888143e-06	0.00136328054324452
LMAN1	1064.93575169433	-0.426173307697843	0.116998989297768	-3.64253836939746	0.000269962722267305	0.0244012686390844
CYP27A1	1138.029698091	-0.422299537479238	0.123781412649651	-3.41165550173925	0.000645696605727927	0.0436585397658283
ARHGAP27	445.860070062602	-0.40877555772306	0.100993803643007	-4.04753106604439	5.17607139071114e-05	0.00916904165233256
ALDH18A1	1084.19008704632	-0.407602219297961	0.111902696797226	-3.64247002944493	0.000270034425803045	0.0244012686390844
TMEM263	502.678753854903	-0.401386845746096	0.0853821396804923	-4.70106332832747	2.58810227306475e-06	0.00132865502247965
SMC1A	991.921649178694	-0.400344511425025	0.109030131860531	-3.67187037742132	0.000240781806435334	0.0235033564718321
ZCCHC7	304.246365039005	-0.392292109647276	0.11330518821307	-3.46226078288287	0.000535657856803774	0.0388940654653862
NAP1L1	2183.39647402937	-0.391835195629094	0.111913118809413	-3.5012445350253	0.000463090714252842	0.0353454519979957
IGSF5	674.714518065001	-0.391766062562573	0.107141398898911	-3.65653301701062	0.000255649496228413	0.0241058344708982
FKBP15	881.661998621665	-0.390573671415488	0.102721090422583	-3.8022734163813	0.000143374372501996	0.0157723188670648
EPCAM	1883.77672758943	-0.384432617838443	0.113418329249363	-3.38951049960563	0.000700175274723302	0.0457789126553759
IST1	2131.06030927547	-0.374777649414746	0.0932492043464993	-4.01909755735965	5.84214787675473e-05	0.00933534092272328
EIF3D	1060.47775959238	0.338709092284153	0.0891795753768836	3.79805679554682	0.000145834911731317	0.0159166748937621		up in non-lactating
LOC100848941	1009.36753641979	0.346847922643968	0.101839284229586	3.40583621799655	0.000659617375147854	0.0437712803161288
RCBTB2	311.704173028481	0.361785333668883	0.103188307977954	3.50606905722475	0.000454777210980453	0.0353454519979957
LOC104968412	638.685006263899	0.372226832541498	0.0887286048742558	4.19511647984334	2.72731396226025e-05	0.00627227534002253
GAS2L2	798.093244275216	0.373094820410676	0.109159764382883	3.41787857934567	0.000631112551813403	0.04352164716759
GAB1	527.0412220353	0.40234877270379	0.119304730699733	3.3724460911481	0.000745036699197533	0.0475896483298479
CAPS2	337.622305494522	0.442902420905244	0.129724677921411	3.4141724458438	0.000639760689759837	0.0436166761650837
EIF3M	1103.20538165252	0.444809676719863	0.132580021511265	3.35502794198949	0.000793569684306635	0.049965495753133
CCDC13	390.032348321869	0.450683961524021	0.110230449705157	4.08856139777625	4.34056667789627e-05	0.00835619371143336
CCNG1	678.397189192474	0.452022865619358	0.116312803946588	3.88626918345921	0.000101796624807116	0.012695704657027
DTX3	256.247475815136	0.456826294225177	0.13091632837294	3.48945238460876	0.000484011277900507	0.0364613061031463
CREBRF	821.776592817285	0.471171356385459	0.118667011387602	3.97053360387134	7.17118402868508e-05	0.00984156255659444
CDH23	209.80412398823	0.492318815712486	0.121852127687313	4.04029724434386	5.33834992816641e-05	0.00924935854428932
LOC100849399	253.139972865819	0.496366818572761	0.145726250126631	3.40615927563795	0.000658837304561884	0.0437712803161288
FAM210B	2802.92404405502	0.507814330992383	0.143167955544555	3.54698318531444	0.000389669460792192	0.0317718140943563
MYH7	205.0414281539	0.508425308696196	0.150194609796448	3.38511022056812	0.000711496786296513	0.046300736877258
LRRC48	747.060983155921	0.530394636104205	0.125804474067428	4.21602363537505	2.48647711602322e-05	0.00584153547545725
SORBS3	374.397172738513	0.53559746126534	0.149293565416824	3.5875455165798	0.000333805474917371	0.0289179855489355
LOC101907905	242.061518936709	0.558299230927201	0.131912832276413	4.23233449917389	2.31278091563891e-05	0.00567169391873328
NR3C1	468.065716310156	0.56452787680699	0.16316520143089	3.45985462498325	0.000540467089759212	0.0390177829747523
MYL5	102.988399047236	0.573111827986124	0.149268273537668	3.83947515706677	0.000123297604238169	0.0141241991102914
SPAG16	95.3910419671304	0.602666615870465	0.176807926527412	3.40859500875957	0.00065298342366509	0.0437712803161288
IGFBP7	164.27316580723	0.605485978939499	0.159788281417785	3.78930152804126	0.000151071454102438	0.0162325691884798
TTC28	649.326127454318	0.612213016909341	0.16933648146654	3.61536398776723	0.000299925913383157	0.026649186444897
LOC104973767	77.0771268995939	0.617505068408924	0.181385669598492	3.40437626509199	0.000663153370347525	0.0437712803161288
ZDHHC11B	121.799204402329	0.618137831374548	0.169281449741689	3.65153909254547	0.000260673409084532	0.0242496249887296
LOC104975663	417.017282439541	0.635885198719217	0.157697673807819	4.03230550815955	5.52323204884457e-05	0.00929978762225362
SVIL	290.007159851725	0.63852434113522	0.145599216310779	4.38549298076097	1.15723390023317e-05	0.00350582366337628
RSPH14	139.731408812835	0.642075465902459	0.160141814313966	4.00941795653468	6.08685965687019e-05	0.00945476491069145
UCP2	603.054636245554	0.653538017921445	0.193575555200686	3.37613918887589	0.000735107200265284	0.04739219024594
AMOTL1	457.41362839367	0.658611437642077	0.165538333426364	3.97860377116244	6.93211547353066e-05	0.00980469924271516
GMNC	304.062734945993	0.665930611930592	0.171823941056618	3.87565672068457	0.000106337511225087	0.0129293354657099
TMEM154	106.3770907518	0.669717634166465	0.189886359111101	3.52693915087718	0.000420393365860641	0.0338783281639206
COL1A2	58.6099858749988	0.679816532424309	0.195708879050471	3.47361108868745	0.000513504745006477	0.0378479120457994
KCNH3	319.990608945933	0.7130069735073	0.173998013690805	4.09778800563964	4.17117021662814e-05	0.00814318174263136
NYAP1	95.2162464458916	0.719677971412	0.184573528492384	3.89913969403091	9.65350710280364e-05	0.012275895591923
KHDRBS3	114.237463795384	0.727683575469665	0.216999897735962	3.35338211244267	0.000798304126628593	0.049965495753133
CTNNA2	141.360902756984	0.728806884938744	0.211648766245097	3.44347334439342	0.000574293202680161	0.0408219388838446
CCSAP	78.9021543774241	0.729355392428571	0.217041475437723	3.36044247283901	0.000778177346308369	0.0494785146659647
THBS3	54.9370011079967	0.742962142805819	0.21693494309571	3.4248154409962	0.000615217192978021	0.0428928081624768
XYLT1	78.2862564795316	0.762841397518161	0.227575252825945	3.35204020668099	0.000802183677719624	0.049965495753133
MME	446.427138820518	0.766811026509811	0.198762042143748	3.85793493686908	0.000114349076113215	0.0135469448205578
CCND2	83.6575125099119	0.774948249329344	0.218325197724236	3.54951355778993	0.000385943591168274	0.0316542255454642
BEX5	43.6369265023504	0.786693163595491	0.234731325864418	3.35146219064893	0.000803860150995502	0.049965495753133
LRP1	388.576662704479	0.788113494180311	0.174735436134545	4.51032436015708	6.47285760065775e-06	0.00236105997901887
ERBB4	106.824299387679	0.815279959215141	0.147754970081778	5.51778365738837	3.43301684901151e-08	4.70390341252757e-05
CPNE5	44.4541796395217	0.824433205175818	0.21926368299259	3.76000801374699	0.000169907914121609	0.0181161045972279
LOC101906903	23.907086994861	0.827210262952396	0.241421399385057	3.42641648610872	0.00061160180447575	0.0428928081624768
SAMD12	43.9594597866373	0.827855992544089	0.235177895399173	3.5201267157313	0.000431340672688092	0.0341646460807408
ANKH	53.9461594994824	0.829098004962439	0.212323096010683	3.90488844850267	9.42688587752641e-05	0.0121712365742353
MYC	37.6128191002014	0.845715020040093	0.211573165708883	3.99726977287738	6.40772614981962e-05	0.00961163281080106
HIST2H2BF	49.7346015604198	0.847404994240134	0.24744958751065	3.4245560995476	0.000615804691171841	0.0428928081624768
C3	1798.05133813836	0.847639915218543	0.237163924749774	3.5740676669644	0.000351478033059222	0.029526284946872
GPR126	51.4770566454515	0.854470769796299	0.237951022793704	3.59095228826606	0.000329471951409849	0.0287220799905152
C2H2orf72	22.5376444801923	0.859849148485438	0.251748101711615	3.41551393094682	0.00063661772982226	0.0436166761650837
CYP1B1	9.13552613506938	0.860354248089118	0.247504361883349	3.47611751785858	0.000508729310521634	0.0377085399633175
KLC3	41.2999765599419	0.862432671932628	0.230673570529592	3.73875806384153	0.00018493159294657	0.0192732090964842
DCHS2	33.3562476595173	0.86447384358563	0.253270019963607	3.41324979446777	0.000641930736431504	0.0436166761650837
LOC512486	53.0287777999476	0.869416389891669	0.254368581405076	3.41793937399504	0.000630971600459532	0.04352164716759
NTM	44.3640834834166	0.872751438730431	0.254806934819359	3.42514790403626	0.000614464811903658	0.0428928081624768
HIST1H1D	207.595966025037	0.873454129905111	0.226943823317992	3.84876802168453	0.000118713361356679	0.0137735068782383
LYPD6	16.4210531294611	0.880915538876163	0.24678964408557	3.5694996122719	0.000357663746876761	0.0296860909907711
ROR2	42.5826649641994	0.889911197138927	0.22081145080385	4.03018590702278	5.5732756134263e-05	0.00929978762225362
NELL2	41.480486330115	0.895076830087146	0.250665108964083	3.5708074162623	0.000355882495579954	0.0296860909907711
TPBG	44.3193974744405	0.895147921871408	0.248930273353207	3.59597854376387	0.000323174437794127	0.0283513979890152
LOC104971063	57.1419580536719	0.898078851960832	0.245608880591315	3.65654063403027	0.000255641903292579	0.0241058344708982
SERPING1	43.5677178897272	0.904097467878032	0.254408271713438	3.55372669995729	0.000379813690941764	0.031336890298475
LOC519282	10.7608498663584	0.909311210802039	0.253900000606937	3.5813753786072	0.000341790161820877	0.029244156993822
NTRK3	54.9735349524542	0.911651735804739	0.24347762073547	3.74429375911807	0.000180901902247198	0.0189960702049122
EHD3	193.31074020818	0.915646449739092	0.227428337003243	4.02608778573638	5.67125236152999e-05	0.00929978762225362
LOC784007	34.0763890340895	0.918916782563726	0.250904782373899	3.66241238556528	0.000249851218583412	0.0240499148665602
CTNND2	13.1075233344175	0.926556112839145	0.254446947853521	3.64145107911666	0.00027110564680896	0.0244012686390844
CELF4	10.424212137256	0.930961687211002	0.254537300171023	3.65746665257112	0.000254720386682638	0.0241058344708982
FRMPD1	12.6979642987272	0.93821353306383	0.253648887932762	3.6988671257748	0.000216563931918704	0.0215956306498213
UPK3B	114.286730734854	0.942364794020281	0.2306694991536	4.0853463395816	4.40111188868348e-05	0.0083566865601427
SLIT3	20.2238527868021	0.945204951676693	0.253293025342299	3.73166592486844	0.000190217655936573	0.0196761711114689
TBX3	53.286004529505	0.945331827198877	0.242694413436329	3.89515281301226	9.81368391379926e-05	0.0123661338844701
CCL28	59.4549787569836	0.94770513845256	0.237656104898391	3.98771636376751	6.67123541803573e-05	0.00973368359256772
TNFSF9	49.3695154640962	0.948425181875999	0.213938068820515	4.43317632576971	9.28548650254052e-06	0.00306443162885034
H2B	107.709678206144	0.968790273832528	0.246570434946896	3.92906097619196	8.52782154765233e-05	0.0111566117844586
CXCL10	15.3189920823018	0.970743268770895	0.239830020425857	4.04763034688978	5.17387706082696e-05	0.00916904165233256
TMIGD2	12.2610526181851	0.973160067200941	0.252921376616664	3.84767820031241	0.000119242538445177	0.0137735068782383
MOG	18.0818177732215	0.974693408445339	0.254174205503195	3.8347455695424	0.000125694337673259	0.0142807312663036
LOC786760	9.16406637396675	0.980897042802102	0.244101288229987	4.01840174590935	5.85942327593193e-05	0.00933534092272328
FMOD	34.2350575576387	0.984101818992268	0.247051179968712	3.98339250643085	6.79384087533511e-05	0.00974610082135468
LOC511531	55.907024758575	1.01714241219914	0.246609589593435	4.12450470347085	3.71533400559795e-05	0.00768630517187958
ST3GAL5	26.5097004114137	1.07597336733652	0.251385473248029	4.28017320744272	1.8674791634458e-05	0.00488398654424948
C1S	21.1141236948287	1.11303242895378	0.25501419120245	4.36459015753427	1.27361314530345e-05	0.00375607485256406
MYRFL	22.6644874913237	1.1912611679073	0.255161224957227	4.66866064037351	3.03169678220692e-06	0.00136766292505246
PDLIM2	18.9602239790013	1.23994573423626	0.247543354231959	5.00900433414334	5.47123412464189e-07	0.000421315423342563
RELN	23.504688630344	1.2767451545261	0.237294723280399	5.38041949216645	7.43124673710843e-08	8.58370925192167e-05
SLCO3A1	44.0035911509027	1.31869388017077	0.22415203639854	5.88303323654014	4.02814995093079e-09	1.39585466174629e-05

## Sheet: top20 ipsi isthmus H vs NL
		baseMean	log2FoldChange	lfcSE	stat	pvalue	padj
up in heifer	GAT	245.321140805404	-1.67995555960132	0.143828397509048	-11.6802772518942	1.6077028298602e-31	2.22843689246922e-27
	MUC15	52.7883380643334	-1.07410173284896	0.211031144881858	-5.08977825737654	3.58482464231385e-07	0.000297719586419459
	FAT4	159.002045939677	-1.06432725788605	0.23578049203087	-4.5140598728868	6.35982495241512e-06	0.00236105997901887
	ANG	191.63053556468	-1.05259122814713	0.219721498870156	-4.79057003324539	1.66308162540795e-06	0.000960498933740819
	SUSD2	301.26775792167	-1.04560620432844	0.22497520479942	-4.64765086117229	3.35736540235605e-06	0.00145426380756429
	GM2A	3168.66125854393	-1.04488040340999	0.172459863697596	-6.05868740127362	1.37236797755622e-09	6.34079751230225e-06
	S100A4	72.5019691882895	-1.01461057641156	0.229584600791967	-4.41933201491562	9.90064445189627e-06	0.00319146122669149
	PRPF4	1407.55855247209	-1.00018094081835	0.177190720271375	-5.64465757172009	1.6551033539092e-08	3.51725507288229e-05
	FER1L6	38.2815147342833	-0.975232805544389	0.216956478810019	-4.49506191699565	6.95497065335621e-06	0.00247186790323514
	LOC785161	14.9806802279079	-0.969499637829917	0.254624729776571	-3.80756275590606	0.000140343131217594	0.0155623691344566
	EPHA5	39.1106803446793	-0.967470284630673	0.233136655991319	-4.14979909751599	3.32767210870447e-05	0.0072070098591801
	SLC7A5	260.413208302301	-0.952012717104255	0.213025769563191	-4.46900259558436	7.8585177230181e-06	0.00272317285396885
	LRP2	15082.0499065016	-0.951074768313552	0.154978017258871	-6.13683659873454	8.4180892105097e-10	5.83415672734375e-06
	CNDP1	54.4525755921599	-0.937829383947085	0.200956242809561	-4.66683378846723	3.05876565014257e-06	0.00136766292505246
	BSG	6628.07322509954	-0.930362488609456	0.165267982094564	-5.62941760901465	1.80819119901105e-08	3.51725507288229e-05
	ENDOU	36.0628121891381	-0.93031147738981	0.231948185060786	-4.01085905089538	6.04982208677306e-05	0.00945476491069145
	CHADL	28.6373198992415	-0.913339006698702	0.226929069103047	-4.0247774791865	5.70292149117349e-05	0.00929978762225362
	CREB3L1	575.061196521582	-0.91149702659305	0.184195760052391	-4.94852338801823	7.47786061317284e-07	0.00049357440932947
	ATP1B2	258.903499894545	-0.910953798654067	0.164739960591739	-5.52964681660698	3.20876154303801e-08	4.70390341252757e-05
	GJB3	129.338556186763	-0.9102566245557	0.192639070303222	-4.72519215921733	2.29897857809657e-06	0.00127464568283986
up in NL	CELF4	10.424212137256	0.930961687211002	0.254537300171023	3.65746665257112	0.000254720386682638	0.0241058344708982
	FRMPD1	12.6979642987272	0.93821353306383	0.253648887932762	3.6988671257748	0.000216563931918704	0.0215956306498213
	UPK3B	114.286730734854	0.942364794020281	0.2306694991536	4.0853463395816	4.40111188868348e-05	0.0083566865601427
	SLIT3	20.2238527868021	0.945204951676693	0.253293025342299	3.73166592486844	0.000190217655936573	0.0196761711114689
	TBX3	53.286004529505	0.945331827198877	0.242694413436329	3.89515281301226	9.81368391379926e-05	0.0123661338844701
	CCL28	59.4549787569836	0.94770513845256	0.237656104898391	3.98771636376751	6.67123541803573e-05	0.00973368359256772
	TNFSF9	49.3695154640962	0.948425181875999	0.213938068820515	4.43317632576971	9.28548650254052e-06	0.00306443162885034
	H2B	107.709678206144	0.968790273832528	0.246570434946896	3.92906097619196	8.52782154765233e-05	0.0111566117844586
	CXCL10	15.3189920823018	0.970743268770895	0.239830020425857	4.04763034688978	5.17387706082696e-05	0.00916904165233256
	TMIGD2	12.2610526181851	0.973160067200941	0.252921376616664	3.84767820031241	0.000119242538445177	0.0137735068782383
	MOG	18.0818177732215	0.974693408445339	0.254174205503195	3.8347455695424	0.000125694337673259	0.0142807312663036
	LOC786760	9.16406637396675	0.980897042802102	0.244101288229987	4.01840174590935	5.85942327593193e-05	0.00933534092272328
	FMOD	34.2350575576387	0.984101818992268	0.247051179968712	3.98339250643085	6.79384087533511e-05	0.00974610082135468
	LOC511531	55.907024758575	1.01714241219914	0.246609589593435	4.12450470347085	3.71533400559795e-05	0.00768630517187958
	ST3GAL5	26.5097004114137	1.07597336733652	0.251385473248029	4.28017320744272	1.8674791634458e-05	0.00488398654424948
	C1S	21.1141236948287	1.11303242895378	0.25501419120245	4.36459015753427	1.27361314530345e-05	0.00375607485256406
	MYRFL	22.6644874913237	1.1912611679073	0.255161224957227	4.66866064037351	3.03169678220692e-06	0.00136766292505246
	PDLIM2	18.9602239790013	1.23994573423626	0.247543354231959	5.00900433414334	5.47123412464189e-07	0.000421315423342563
	RELN	23.504688630344	1.2767451545261	0.237294723280399	5.38041949216645	7.43124673710843e-08	8.58370925192167e-05
	SLCO3A1	44.0035911509027	1.31869388017077	0.22415203639854	5.88303323654014	4.02814995093079e-09	1.39585466174629e-05

## Sheet: NL vs. L in ipsi isthmus  
		baseMean	log2FoldChange	lfcSE	stat	pvalue	padj
up in NL	MYRF	132.801173312317	-1.08861659436802	0.192861514968953	-5.64455067431816	1.65613198181948e-08	0.000161298460844285
	PGM5	66.1978275026415	-0.975485646593425	0.205069554881781	-4.75685260620854	1.96634631153936e-06	0.00585577931576421
	ANK2	5360.10212176487	-0.772636146661813	0.164227930057513	-4.70465740140081	2.54292614146642e-06	0.00631069504107251
	KCNH3	337.668850554582	-0.750781721956736	0.166990095924652	-4.49596557088928	6.9254942783573e-06	0.01145784553386
	TGFA	264.391332832484	-0.737519124699059	0.150126805543757	-4.91264116376671	8.98576432106803e-07	0.00445993435802343
	ATP2B2	989.300892953013	-0.709030080044259	0.161579801684479	-4.38811084462648	1.14339501392324e-05	0.0165199445113321
up in L	MYLK3	351.365434477647	0.612767159601209	0.149238964839054	4.10594619348938	4.02663210604008e-05	0.0428261086135262
	FAT4	123.945491574721	0.809704041592227	0.197188006209098	4.10625401188761	4.02127266405593e-05	0.0428261086135262
	LOC104974266	310.845478136508	0.826776755007718	0.189391294852746	4.36544222188536	1.26865833806458e-05	0.0165199445113321
	LOC100847661	93.7794705462385	0.876104142013681	0.216105967065469	4.05404882572384	5.03387025511574e-05	0.0499695520657823
	SPP1	27.652156648741	0.998605384360256	0.215538414147059	4.6330738226501	3.60275993315329e-06	0.00766358505780751
	BLA-DQB	247.102055641979	1.0023588755866	0.217853638227082	4.60106557661335	4.20335057958887e-06	0.00782348626625979
	TACR1	156.428787350495	1.01471262607327	0.233005527809085	4.35488649395769	1.33135885920742e-05	0.0165199445113321
	ATP13A5	180.962442890052	1.1001736369863	0.229699439057695	4.78962265428067	1.67095236821668e-06	0.00585577931576421
	STEAP4	340.163422122976	1.16821430281404	0.208678699316958	5.59814828555962	2.16653406103808e-08	0.000161298460844285

## Sheet: VENN lists
heifervsdry	heifevslact	dryvslact	heifervsdry|heifevslact	heifervsdry|dryvslact	heifevslact|dryvslact
MUC15	LOC101908066	MYRF	GAT	FAT4	TGFA
ANG	TMIE	PGM5	GM2A	KCNH3	TACR1
SUSD2	ME3	ANK2	LRP2		STEAP4
S100A4	TUBB3	ATP2B2	BSG		BLA-DQB
PRPF4	PDZK1	MYLK3	TIMP1
FER1L6	GJB4	LOC104974266	LOC104974515
LOC785161	MCTP1	LOC100847661	GLUD1
EPHA5	PLA2G4D	SPP1	AGT
SLC7A5	ABCC8	ATP13A5	ACY1
CNDP1	EFCAB3		NEBL
ENDOU	SLC18A2		SEL1L3
CHADL	RNASE11		CAMK2B
CREB3L1	LOC613970		OGDH
ATP1B2	LOC785803		HSD17B10
GJB3	LDLR		DNAJB9
FABP5	CABYR		SLC23A1
MMP11	CNNM4		ERBB4
DUSP5	ITGB3		HIST2H2BF
AKAP12	CDKN1C		GPR126
SCNN1A	LOC511937		HIST1H1D
TFF3	CABIN1		TNFSF9
DSC3	DHCR24		H2B
CGREF1	SEC23B
HIF3A	SCP2
RNASE1	MCF2L
LAMA2	FBXO44
FAM105A	SQLE
LOC104968712	WBSCR22
SEMA6C	PPIA
GNAL	ANAPC4
UHRF1	INSIG1
LRRC3	ADK
BPIFA1	HMGCS1
FMNL2	HSPA5
GJB5	MANF
AFMID	PROSC
SLC31A2	NUCB2
SALL1	FASN
MBOAT2	COL7A1
LOC104974911	IDI1
SLC31A1	LOC104969340
P2RY2	TXNRD1
LOC100848461	TST
CSTB	GNPNAT1
FLVCR1	LLGL2
MGAT3	CYP51A1
ABLIM2	HMGCR
RNASE4	HK1
PMVK	C2CD2L
S100A2	GDE1
OSBPL8	DSG2
LOC100296081	COPS3
BPIFB1	DDX5
SLC13A5	FGF2
GCA	CHPT1
C13H10orf113	PRKAG3
KLK10	NFKBIZ
KSR2	RPL37
MYCL	CGNL1
SLC30A4	KNSTRN
KIAA1644	LOC104968720
C8H9orf64	LOC784738
MYO1A	ALDH9A1
CYB5B	TXNIP
RAPGEF3	C28H10orf54
MRPS36	NTN4
PBXIP1	BRCA2
GAL3ST2	LOC783920
LPHN3	MMRN2
ODC1	LOC101908813
LOXL4	CHRDL1
HK2	MAP3K15
TSKU	LOC101902444
MECOM	DRAM1
RABEP1	LOC101904283
TXNDC17	PSMB9
TTC39C	AIF1L
PARP14	CSF1R
GSN	LOC101905641
SETX	LOC505183
TJP3	FLT3
RNF180	LOC100847863
PTCH2	DYRK4
SOX5	HIST1H2BL
PTRF	LOC101906554
ALCAM	LOC101906512
FRYL	LOC100297225
UNC13B	KLF11
POLR2G	PDK4
SH3BGRL	FYB
CNOT1	FAM101B
TM9SF3	BOLA-DMA
PNKD	PHLDB2
MRPL19	LOC518961
CD320	FGD3
TRPM4	VNN1
HIBCH	ASB15
USP54	ACSBG2
MAPKAPK5	ABCA13
SORBS2	COL3A1
ESRP1	SAA3
LOC104968722
LMAN1
CYP27A1
ARHGAP27
ALDH18A1
TMEM263
SMC1A
ZCCHC7
NAP1L1
IGSF5
FKBP15
EPCAM
IST1
EIF3D
LOC100848941
RCBTB2
LOC104968412
GAS2L2
GAB1
CAPS2
EIF3M
CCDC13
CCNG1
DTX3
CREBRF
CDH23
LOC100849399
FAM210B
MYH7
LRRC48
SORBS3
LOC101907905
NR3C1
MYL5
SPAG16
IGFBP7
TTC28
LOC104973767
ZDHHC11B
LOC104975663
SVIL
RSPH14
UCP2
AMOTL1
GMNC
TMEM154
COL1A2
NYAP1
KHDRBS3
CTNNA2
CCSAP
THBS3
XYLT1
MME
CCND2
BEX5
LRP1
CPNE5
LOC101906903
SAMD12
ANKH
MYC
C3
C2H2orf72
CYP1B1
KLC3
DCHS2
LOC512486
NTM
LYPD6
ROR2
NELL2
TPBG
LOC104971063
SERPING1
LOC519282
NTRK3
EHD3
LOC784007
CTNND2
CELF4
FRMPD1
UPK3B
SLIT3
TBX3
CCL28
CXCL10
TMIGD2
MOG
LOC786760
FMOD
LOC511531
ST3GAL5
C1S
MYRFL
PDLIM2
RELN
SLCO3A1

## Sheet: GOterms H vs L ipsi isthmus 
GOID	GOTerm	Ontology Source	Term PValue	Term PValue Corrected with Bonferroni step down	Group PValue	Group PValue Corrected with Bonferroni step down	GOLevels	GOGroups	% Associated Genes	Nr. Genes	Cluster	Genes Cluster #1 upregulated in heifer	Genes Cluster #2 up regulated in Lactating	%Genes Cluster #1	%Genes Cluster #2	Associated Genes Found
GO:0006090	pyruvate metabolic process	GO_BiologicalProcess-EBI-UniProt-GOA_14.12.2018_00h00	0.000368791	0.00663823	0.000368791	0.00110637	[7]	Group0	7.69231	5	Specific for Cluster #1	[HK1, ME3, OGDH]	[PDK4, PRKAG3]	60	40	[HK1, ME3, OGDH, PDK4, PRKAG3]
KEGG:05322	Systemic lupus erythematosus	KEGG_14.12.2018	2.7583e-05	0.000579243	2.7583e-05	0.000110332	[-1]	Group1	7.52688	7	Specific for Cluster #2	[]	[BLA-DQB, BOLA-DMA, H2B, HIST1H2BL, HIST2H2BF, LOC505183, LOC518961]	0	100	[BLA-DQB, BOLA-DMA, H2B, HIST1H2BL, HIST2H2BF, LOC505183, LOC518961]
GO:0015748	organophosphate ester transport	GO_BiologicalProcess-EBI-UniProt-GOA_14.12.2018_00h00	0.0343542	0.0343542	0.0343542	0.0343542	[5]	Group2	4	3	Specific for Cluster #1	[C2CD2L, LDLR, SCP2]	[]	100	0	[C2CD2L, LDLR, SCP2]
KEGG:04640	Hematopoietic cell lineage	KEGG_14.12.2018	0.000127929	0.00243066	0.00101018	0.00202036	[-1]	Group3	9.61539	5	Specific for Cluster #2	[ITGB3]	[BLA-DQB, BOLA-DMA, CSF1R, FLT3]	20	80	[BLA-DQB, BOLA-DMA, CSF1R, FLT3, ITGB3]
GO:0070374	positive regulation of ERK1 and ERK2 cascade	GO_BiologicalProcess-EBI-UniProt-GOA_14.12.2018_00h00	0.0343542	0.0343542	0.00101018	0.00202036	[6, 7, 8, 9, 10, 11, 12]	Group3	4	3	Specific for Cluster #2	[]	[CSF1R, FGF2, FLT3]	0	100	[CSF1R, FGF2, FLT3]
KEGG:00100	Steroid biosynthesis	KEGG_14.12.2018	0.000513848	0.00873541	2.51848e-05	0.000125924	[-1]	Group4	17.6471	3	Specific for Cluster #1	[CYP51A1, DHCR24, SQLE]	[]	100	0	[CYP51A1, DHCR24, SQLE]
KEGG:00900	Terpenoid backbone biosynthesis	KEGG_14.12.2018	0.000843799	0.012657	2.51848e-05	0.000125924	[-1]	Group4	15	3	Specific for Cluster #1	[HMGCR, HMGCS1, IDI1]	[]	100	0	[HMGCR, HMGCS1, IDI1]
GO:0006066	alcohol metabolic process	GO_BiologicalProcess-EBI-UniProt-GOA_14.12.2018_00h00	0.000902223	0.0126311	2.51848e-05	0.000125924	[3, 4]	Group4	4.29448	7	Specific for Cluster #1	[CYP51A1, GDE1, HMGCR, IDI1, INSIG1, LDLR, SQLE]	[]	100	0	[CYP51A1, GDE1, HMGCR, IDI1, INSIG1, LDLR, SQLE]
GO:0008202	steroid metabolic process	GO_BiologicalProcess-EBI-UniProt-GOA_14.12.2018_00h00	1.25513e-06	3.26335e-05	2.51848e-05	0.000125924	[4]	Group4	7.89474	9	Specific for Cluster #1	[CYP51A1, DHCR24, HMGCR, HMGCS1, IDI1, INSIG1, LDLR, SCP2, SQLE]	[]	100	0	[CYP51A1, DHCR24, HMGCR, HMGCS1, IDI1, INSIG1, LDLR, SCP2, SQLE]
GO:1901617	organic hydroxy compound biosynthetic process	GO_BiologicalProcess-EBI-UniProt-GOA_14.12.2018_00h00	0.00375541	0.0413095	2.51848e-05	0.000125924	[4]	Group4	4.58716	5	Specific for Cluster #1	[CYP51A1, HMGCR, HMGCS1, IDI1, SQLE]	[]	100	0	[CYP51A1, HMGCR, HMGCS1, IDI1, SQLE]
GO:0016125	sterol metabolic process	GO_BiologicalProcess-EBI-UniProt-GOA_14.12.2018_00h00	1.62802e-06	4.07004e-05	2.51848e-05	0.000125924	[4, 5]	Group4	11.4754	7	Specific for Cluster #1	[CYP51A1, HMGCR, HMGCS1, IDI1, INSIG1, LDLR, SQLE]	[]	100	0	[CYP51A1, HMGCR, HMGCS1, IDI1, INSIG1, LDLR, SQLE]
GO:1902652	secondary alcohol metabolic process	GO_BiologicalProcess-EBI-UniProt-GOA_14.12.2018_00h00	1.5555e-05	0.00034221	2.51848e-05	0.000125924	[4, 5]	Group4	10.5263	6	Specific for Cluster #1	[CYP51A1, HMGCR, IDI1, INSIG1, LDLR, SQLE]	[]	100	0	[CYP51A1, HMGCR, IDI1, INSIG1, LDLR, SQLE]
GO:0006694	steroid biosynthetic process	GO_BiologicalProcess-EBI-UniProt-GOA_14.12.2018_00h00	3.63508e-05	0.000727016	2.51848e-05	0.000125924	[5]	Group4	9.09091	6	Specific for Cluster #1	[CYP51A1, HMGCR, HMGCS1, IDI1, SCP2, SQLE]	[]	100	0	[CYP51A1, HMGCR, HMGCS1, IDI1, SCP2, SQLE]
GO:0008299	isoprenoid biosynthetic process	GO_BiologicalProcess-EBI-UniProt-GOA_14.12.2018_00h00	0.000612375	0.009798	2.51848e-05	0.000125924	[4, 5, 6]	Group4	16.6667	3	Specific for Cluster #1	[HMGCR, HMGCS1, IDI1]	[]	100	0	[HMGCR, HMGCS1, IDI1]
GO:0008203	cholesterol metabolic process	GO_BiologicalProcess-EBI-UniProt-GOA_14.12.2018_00h00	1.40247e-05	0.000322569	2.51848e-05	0.000125924	[5, 6]	Group4	10.7143	6	Specific for Cluster #1	[CYP51A1, HMGCR, IDI1, INSIG1, LDLR, SQLE]	[]	100	0	[CYP51A1, HMGCR, IDI1, INSIG1, LDLR, SQLE]
GO:0016126	sterol biosynthetic process	GO_BiologicalProcess-EBI-UniProt-GOA_14.12.2018_00h00	8.27747e-06	0.000198659	2.51848e-05	0.000125924	[5, 6]	Group4	16.6667	5	Specific for Cluster #1	[CYP51A1, HMGCR, HMGCS1, IDI1, SQLE]	[]	100	0	[CYP51A1, HMGCR, HMGCS1, IDI1, SQLE]
GO:1902653	secondary alcohol biosynthetic process	GO_BiologicalProcess-EBI-UniProt-GOA_14.12.2018_00h00	0.00164475	0.0213818	2.51848e-05	0.000125924	[5, 6]	Group4	12	3	Specific for Cluster #1	[CYP51A1, HMGCR, IDI1]	[]	100	0	[CYP51A1, HMGCR, IDI1]
GO:0033865	nucleoside bisphosphate metabolic process	GO_BiologicalProcess-EBI-UniProt-GOA_14.12.2018_00h00	0.0029772	0.0357264	2.51848e-05	0.000125924	[5, 6, 7]	Group4	6.34921	4	Specific for Cluster #1	[HMGCR, HMGCS1, OGDH]	[PDK4]	75	25	[HMGCR, HMGCS1, OGDH, PDK4]
GO:0006695	cholesterol biosynthetic process	GO_BiologicalProcess-EBI-UniProt-GOA_14.12.2018_00h00	0.00164475	0.0213818	2.51848e-05	0.000125924	[6, 7]	Group4	12	3	Specific for Cluster #1	[CYP51A1, HMGCR, IDI1]	[]	100	0	[CYP51A1, HMGCR, IDI1]
GO:0034032	purine nucleoside bisphosphate metabolic process	GO_BiologicalProcess-EBI-UniProt-GOA_14.12.2018_00h00	0.0029772	0.0357264	2.51848e-05	0.000125924	[5, 6, 7, 8]	Group4	6.34921	4	Specific for Cluster #1	[HMGCR, HMGCS1, OGDH]	[PDK4]	75	25	[HMGCR, HMGCS1, OGDH, PDK4]
GO:0033875	ribonucleoside bisphosphate metabolic process	GO_BiologicalProcess-EBI-UniProt-GOA_14.12.2018_00h00	0.0029772	0.0357264	2.51848e-05	0.000125924	[6, 7, 8]	Group4	6.34921	4	Specific for Cluster #1	[HMGCR, HMGCS1, OGDH]	[PDK4]	75	25	[HMGCR, HMGCS1, OGDH, PDK4]

## Sheet: GOterms H vs NL ipsi isthmus
GOID	GOTerm	Ontology Source	Term PValue	Term PValue Corrected with Bonferroni step down	Group PValue	Group PValue Corrected with Bonferroni step down	GOLevels	GOGroups	% Associated Genes	Nr. Genes	Cluster	Genes Cluster #1 up regulated in heifer	Genes Cluster #2 up regulated in Non Lactating	%Genes Cluster #1	%Genes Cluster #2	Associated Genes Found
GO:0006959	humoral immune response	GO_BiologicalProcess-EBI-UniProt-GOA_14.12.2018_00h00	0.00140164	0.0350411	0.00140164	0.00140164	[3]	Group0	9.80392	5	Specific for Cluster #2	[BPIFA1]	[C1S, C3, CXCL10, SERPING1]	20	80	[BPIFA1, C1S, C3, CXCL10, SERPING1]
